# Supplementary material for: Recovery of dye-sensitized solar cell's performance by heat treatment
Source: Royal Society of Chemistry journal article supplement (doi:10.1039/c4cp01463d), 2014-01-01
Supplement: c4cp01463d1.pdf [file c4cp01463d1.pdf]

Electronic supplementary data of the

## Recovery of dye-sensitized solar cell's performance by heat treatment

Marko Berginc, Marko Topič, Urša Opara Krašovec  
University of Ljubljana, Faculty of Electrical Engineering  
Tržaška 25, SI-1000 Ljubljana, Slovenia  
(E-mail: marko.berginc@fe.uni-lj.si)

**Abstract:** The formation of iodine containing crystals with ageing in ionic liquid based dye-sensitized solar cells (DSSCs) containing an  $I_3^-/I^-$  redox couple has already been confirmed. In this report we show how the size of these crystals can reversibly change during operation and the effects this has on cell performance. We also show how heat treatment and applied forward and reverse current treatment influence crystal growth in the cell. Crystal growth was tracked using electroluminescence and transmittance imaging, while current-voltage characterization and electrical impedance spectroscopy was used to measure cell performance and follow the changes in  $I_3^-$  diffusion, charge transfer resistance, and recombinations occurring in the DSSCs. Results reveal that applying a reverse current to the DSSC leads to the rapid formation of  $H_2$  bubbles while crystals grow rapidly when a forward current is applied. Additionally heat treatment at 80 °C can completely recover performance of a degraded cell showing visible defects and a large inhomogeneous active area.

### Heat treatment

**Table S1:** The performance parameters ( $J_{SC}$ ,  $V_{OC}$ ,  $FF$  and  $\eta$ ) of the reference DSSCs and the cells exposed to heat treatment at 60 °C or 80 °C for different time periods. Additionally the cell performance that were measured (a) 11 months prior the heat treatment, 9 months after the treatment and after additional heat treatment at 80 °C for 8 h (c) are given. For each temperature treatment two identical cells are presented.

| cell             | phase – time      | $J_{SC}$<br>(mA/cm <sup>2</sup> ) | $V_{OC}$<br>(V) | $FF$<br>(%) | $\eta$<br>(%) |
|------------------|-------------------|-----------------------------------|-----------------|-------------|---------------|
| cell 1<br>(ref.) | a                 | 10.07                             | 0.662           | 59.5        | 3.97          |
|                  | b – 0 min         | 8.99                              | 0.693           | 68.1        | 4.24          |
|                  | b – 5 min         | 9.42                              | 0.702           | 65.6        | 4.34          |
|                  | b – 15 min        | 9.43                              | 0.702           | 65.8        | 4.36          |
|                  | b – 30 min        | 9.44                              | 0.703           | 65.9        | 4.37          |
|                  | b – 60 min        | 9.47                              | 0.704           | 65.6        | 4.37          |
|                  | b – 120 min       | 9.46                              | 0.705           | 65.3        | 4.35          |
|                  | b – 240 min       | 9.32                              | 0.707           | 65.1        | 4.29          |
|                  | b – 360 min       | 9.34                              | 0.706           | 65.0        | 4.29          |
|                  | c – 1             | 8.97                              | 0.695           | 66.7        | 4.16          |
|                  | c – 2             | 9.73                              | 0.666           | 65.0        | 4.21          |
|                  | cell 1a<br>(ref.) | a                                 | 10.35           | 0.662       | 61.1          |
| b – 0 min        |                   | 9.54                              | 0.695           | 66.3        | 4.40          |
| b – 5 min        |                   | 9.83                              | 0.701           | 63.5        | 4.38          |
| b – 15 min       |                   | 10.01                             | 0.698           | 64.2        | 4.49          |
| b – 30 min       |                   | 10.13                             | 0.693           | 64.4        | 4.52          |
| b – 60 min       |                   | 10.23                             | 0.694           | 63.8        | 4.53          |
| b – 120 min      |                   | 10.18                             | 0.694           | 63.2        | 4.47          |
| b – 240 min      |                   | 10.21                             | 0.692           | 63.5        | 4.48          |
| b – 360 min      |                   | 10.21                             | 0.693           | 62.9        | 4.45          |
| c – 1            |                   | 9.69                              | 0.684           | 65.8        | 4.36          |
| c – 2            |                   | 10.49                             | 0.640           | 66.1        | 4.44          |

|                    |             |       |       |      |      |
|--------------------|-------------|-------|-------|------|------|
| cell 2<br>(60 °C)  | a           | 11.08 | 0.656 | 64.1 | 4.66 |
|                    | b – 0 min   | 10.05 | 0.693 | 68.6 | 4.78 |
|                    | b – 5 min   | 10.18 | 0.701 | 66.6 | 4.75 |
|                    | b – 15 min  | 10.42 | 0.692 | 66.9 | 4.83 |
|                    | b – 30 min  | 10.52 | 0.688 | 66.9 | 4.84 |
|                    | b – 60 min  | 10.67 | 0.680 | 67.2 | 4.88 |
|                    | b – 120 min | 10.76 | 0.678 | 66.8 | 4.87 |
|                    | b – 240 min | 10.86 | 0.674 | 66.6 | 4.87 |
|                    | b – 360 min | 10.87 | 0.670 | 66.9 | 4.87 |
|                    | c – 1       | 10.19 | 0.682 | 68.4 | 4.75 |
|                    | c – 2       | 11.03 | 0.639 | 67.9 | 4.79 |
| cell 2a<br>(60 °C) | a           | 10.66 | 0.663 | 60.5 | 4.28 |
|                    | b – 0 min   | 9.68  | 0.699 | 66.0 | 4.46 |
|                    | b – 5 min   | 10.21 | 0.700 | 63.9 | 4.57 |
|                    | b – 15 min  | 10.25 | 0.694 | 63.9 | 4.55 |
|                    | b – 30 min  | 10.31 | 0.693 | 63.5 | 4.54 |
|                    | b – 60 min  | 10.45 | 0.689 | 63.5 | 4.57 |
|                    | b – 120 min | 10.45 | 0.686 | 63.2 | 4.53 |
|                    | b – 240 min | 10.51 | 0.684 | 63.1 | 4.53 |
|                    | b – 360 min | 10.65 | 0.680 | 63.4 | 4.59 |
|                    | c – 1       | 9.90  | 0.686 | 65.9 | 4.48 |
|                    | c – 2       | 10.64 | 0.640 | 65.1 | 4.43 |
| cell 3<br>(80 °C)  | a           | 9.87  | 0.666 | 59.2 | 3.89 |
|                    | b – 0 min   | 9.41  | 0.696 | 64.7 | 4.24 |
|                    | b – 5 min   | 9.84  | 0.685 | 63.6 | 4.29 |
|                    | b – 15 min  | 10.00 | 0.678 | 63.2 | 4.29 |
|                    | b – 30 min  | 10.15 | 0.664 | 63.7 | 4.30 |
|                    | b – 60 min  | 10.31 | 0.658 | 63.7 | 4.32 |
|                    | b – 120 min | 10.26 | 0.654 | 63.8 | 4.28 |
|                    | b – 240 min | 10.43 | 0.646 | 63.6 | 4.29 |
|                    | b – 360 min | 10.37 | 0.639 | 64.0 | 4.24 |
|                    | c – 1       | 9.37  | 0.672 | 66.9 | 4.21 |
|                    | c – 2       | 9.63  | 0.654 | 66.3 | 4.18 |
| cell 3a<br>(80 °C) | a           | 9.98  | 0.653 | 59.5 | 3.88 |
|                    | b – 0 min   | 9.60  | 0.694 | 65.6 | 4.37 |
|                    | b – 5 min   | 9.80  | 0.699 | 64.0 | 4.38 |
|                    | b – 15 min  | 9.87  | 0.693 | 63.5 | 4.35 |
|                    | b – 30 min  | 10.04 | 0.681 | 63.5 | 4.34 |
|                    | b – 60 min  | 10.20 | 0.679 | 63.0 | 4.36 |
|                    | b – 120 min | 10.29 | 0.670 | 63.1 | 4.35 |
|                    | b – 240 min | 10.54 | 0.657 | 63.1 | 4.37 |
|                    | b – 360 min | 10.32 | 0.659 | 62.8 | 4.27 |
|                    | c – 1       | 9.56  | 0.677 | 66.1 | 4.28 |
|                    | c – 2       | 9.74  | 0.663 | 65.8 | 4.25 |

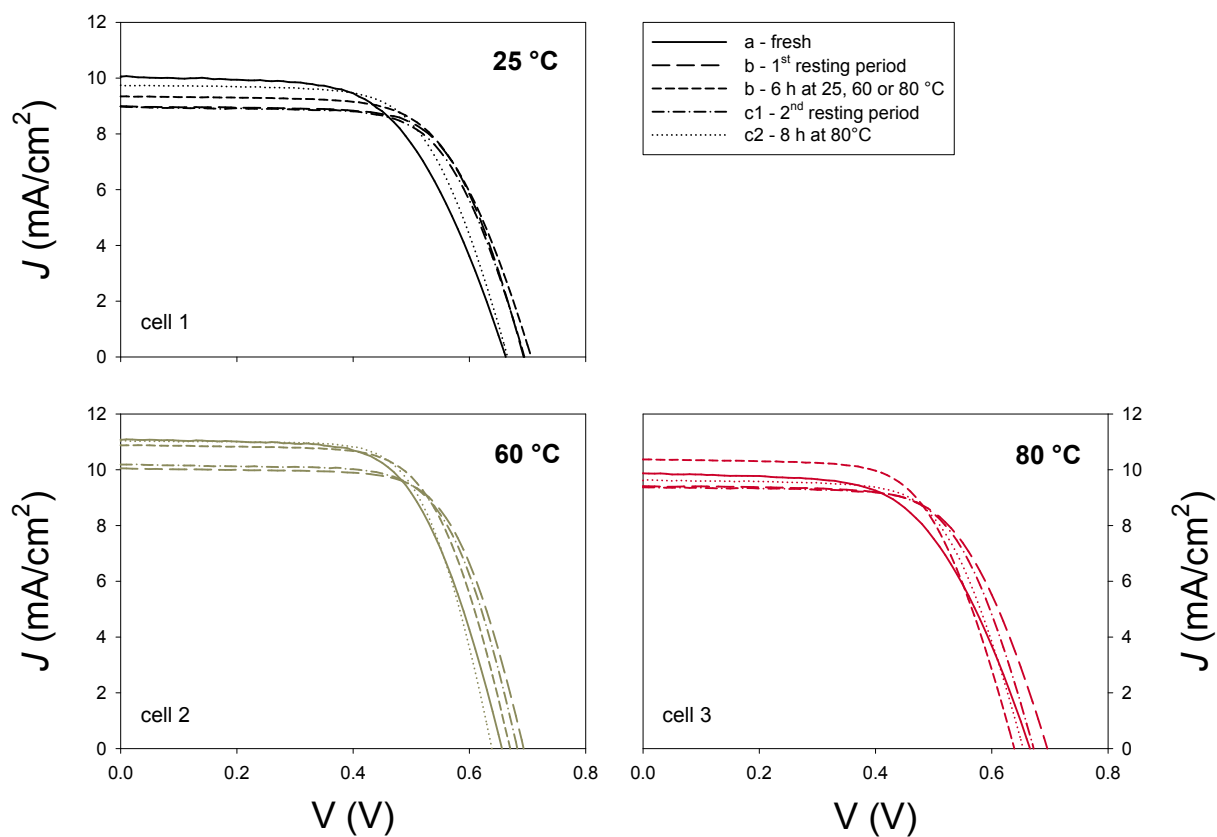

**Fig. S1:** The current-voltage scans ( $I$ - $V$ ) of the reference cell (cell 1) and cells exposed to the heat treatment at 60 °C or 80 °C (cells 2 and 3, respectively). The  $I$ - $V$  scans were measured after production, after 1<sup>st</sup> resting period, after heat treatment at 25, 60 or 80 °C for 6 h, after 2<sup>nd</sup> resting period and after final heat treatment at 80 °C for 8 h.

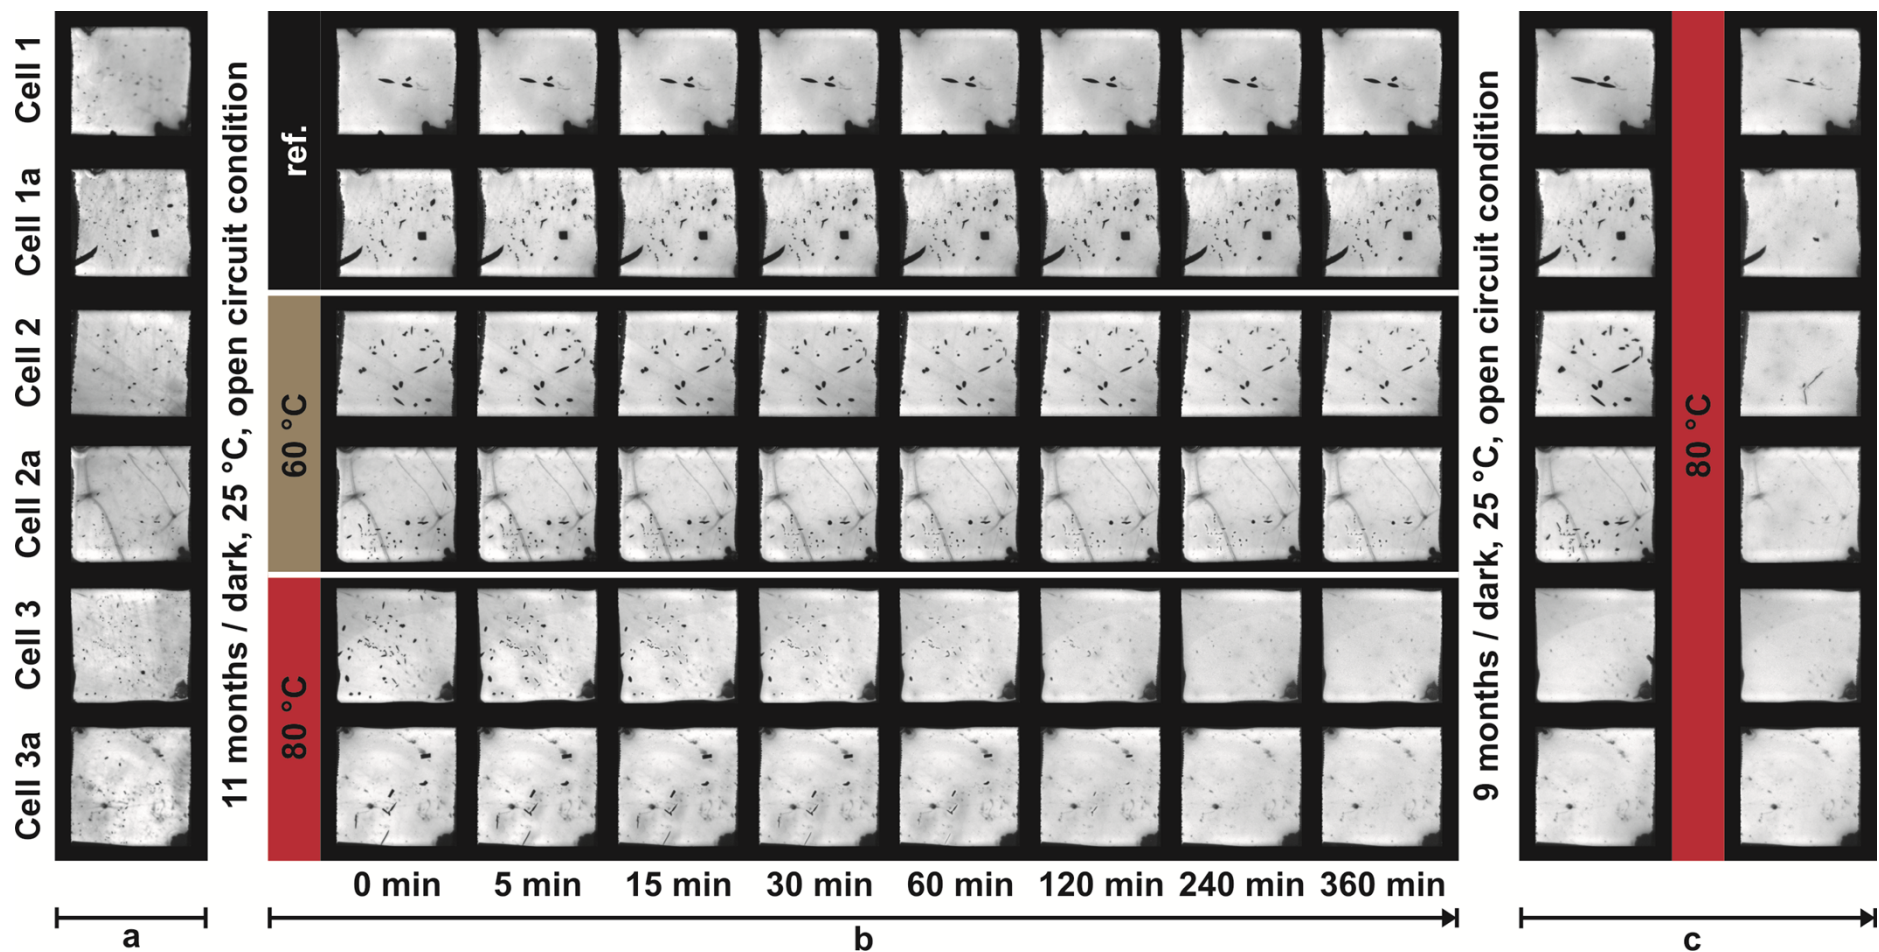

**Fig. S2:** The electroluminescence (EL) images of the reference cells and cells exposed to heat treatment at 60 °C or 80 °C. For each temperature treatment two identical cells are presented. The timeline of the heat treatment is given below (b). Additionally the EL images are given for the cells 11 months prior the treatment (a), 9 months after the treatment and after additional heat treatment at 80 °C for 8 h (c).

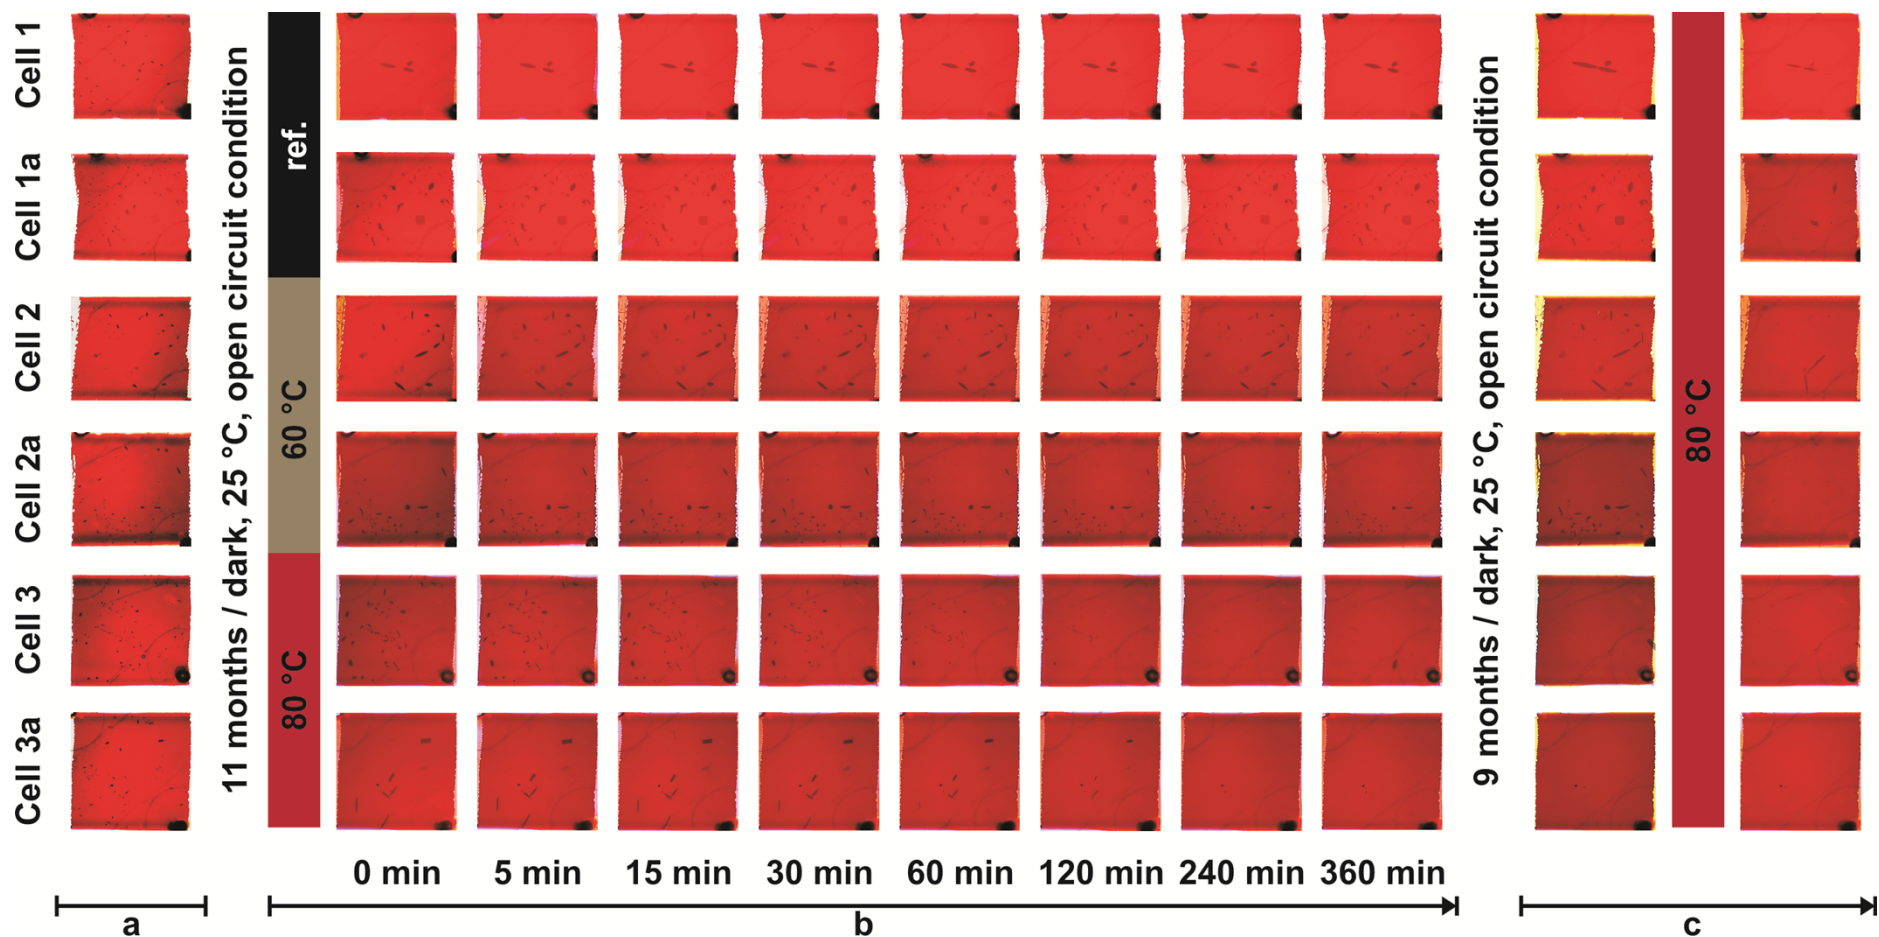

**Fig. S3:** The transmittance images (TI) of the reference cells and cells exposed to heat treatment at 60 °C or 80 °C. For each temperature treatment two identical cells are presented. The timeline of the heat treatment is given below (b). Additionally the TI images are given for the cells 11 months prior the treatment (a), 9 months after the treatment and after additional heat treatment at 80 °C for 8 h (c).

The electrical impedance spectra (EIS) were analysed according to the procedure described by M. Adachi, *et al.* [M. Adachi, *et al.*, *J. Phys. Chem. B* **110** (2006) 13872]. Fig. S4 shows a typical Nyquist plot of the EIS spectrum of illuminated DSSC measured under open-circuit conditions. The parameters determined from the spectrum are included in Fig. S4:

- The series resistance  $R_s$  equals the real part of the impedance measured at high frequency. It gives the sum of the TCO resistance and resistance outside of the cell like cables, contacts, *etc.*
- The charge transfer resistance  $R_{ct}$  is defined as the radius of the semicircle in a high frequency range. It gives the resistance for the electron transfer at the Pt (counter electrode)/electrolyte interface.
- The peak frequency of the semicircle in a high frequency range  $\omega_1$  is the angular frequency ( $2\pi f$ ) where the impedance of the high frequency semicircle reaches the highest imaginary part (*i.e.* the maximal angle of the impedance). The  $\omega_1$  is inversely proportional to the capacitance at the counter electrode.
- The peak frequency of the central semicircle  $\omega_2$  is the angular frequency where the impedance of the central semicircle reaches the highest imaginary part. It is proportional to the effective recombination constant for the electrons  $k_{eff}$ .
- The charge transfer resistance related to the recombination of the photo generated electrons  $R_k$  equals to the radius of the central semicircle. Independently it does not describe any process in the dye-sensitized solar cell but in a combination with electron transport resistance in  $\text{TiO}_2$  (fitted parameter) and  $k_{eff}$  it is possible to obtain the effective electron diffusion coefficient.
- The resistance correlated to the diffusion process of the tri-iodide ions in the electrolyte  $R_d$  equals the radius of the semicircle at a low frequency range.
- The peak frequency of the semicircle in a low frequency range  $\omega_3$  is the angular frequency where the impedance of the low frequency semicircle reaches the highest imaginary part. The  $\omega_3$  is proportional to the diffusion coefficient of the  $\text{I}_3^-$  ions in the electrolyte  $D_I$ .

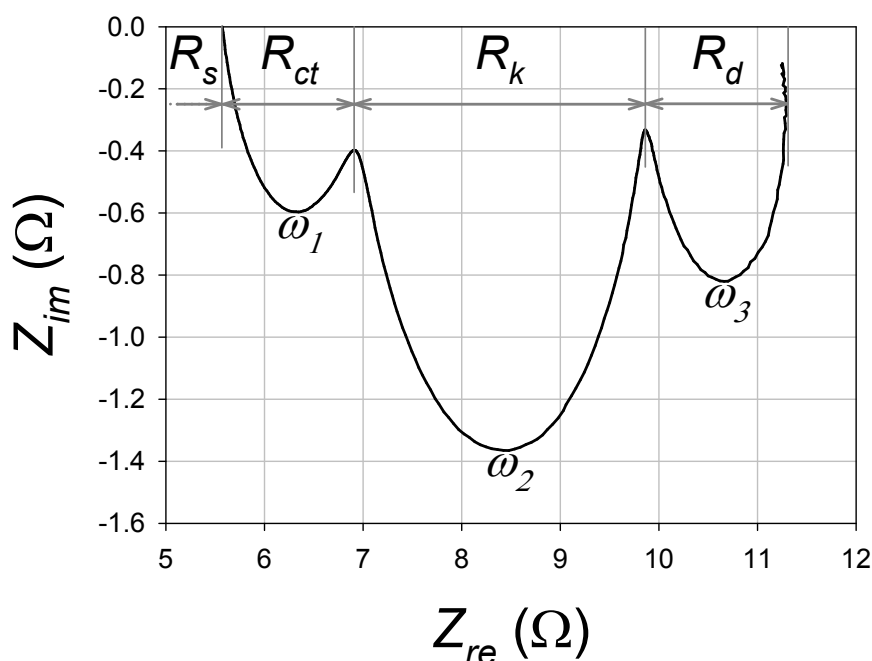

**Fig. S4** A typical Nyquist plot of the EIS spectrum of illuminated DSSC under open-circuit condition.

**Table S2:** The parameters extracted from the Nyquist plots of the EIS spectra of the three identical DSSCs illuminated under open-circuit condition. The spectra of each cell were measured before heat treatment and after heat treatment at 80 °C for 4, 12 and 20 hours.

| cell   | time   | $R_s$<br>( $\Omega$ ) | $R_{ct}$<br>( $\Omega$ ) | $R_k$<br>( $\Omega$ ) | $R_d$<br>( $\Omega$ ) | $\omega_1$<br>[ $10^3\text{s}^{-1}$ ] | $\omega_2$<br>[ $\text{s}^{-1}$ ] | $\omega_3$<br>[ $\text{s}^{-1}$ ] |
|--------|--------|-----------------------|--------------------------|-----------------------|-----------------------|---------------------------------------|-----------------------------------|-----------------------------------|
| cell 1 | before | 5.63                  | 1.42                     | 3.38                  | 1.03                  | 60.7                                  | 487.8                             | 1.55                              |
|        | 4 h    | 5.65                  | 0.76                     | 3.02                  | 1.64                  | 110.3                                 | 559.8                             | 1.31                              |
|        | 12 h   | 5.65                  | 0.75                     | 3.66                  | 1.35                  | 82.9                                  | 659.4                             | 1.26                              |
|        | 20 h   | 5.66                  | 0.69                     | 3.26                  | 1.61                  | 104.4                                 | 629.8                             | 1.32                              |
| cell 2 | before | 5.70                  | 1.87                     | 3.59                  | 1.39                  | 50.5                                  | 487.8                             | 1.83                              |
|        | 4h     | 5.70                  | 1.24                     | 3.31                  | 1.43                  | 72.9                                  | 510.7                             | 1.73                              |
|        | 12 h   | 5.70                  | 1.18                     | 3.80                  | 1.42                  | 82.9                                  | 548.5                             | 1.58                              |
|        | 20 h   | 5.69                  | 0.93                     | 3.39                  | 1.43                  | 90.9                                  | 523.8                             | 1.73                              |
| cell 3 | before | 5.57                  | 1.34                     | 2.95                  | 1.43                  | 635.3                                 | 510.7                             | 2.05                              |
|        | 4 h    | 5.58                  | 0.83                     | 2.83                  | 1.39                  | 100.6                                 | 559.8                             | 2.05                              |
|        | 12 h   | 5.60                  | 0.76                     | 3.07                  | 1.35                  | 104.4                                 | 629.8                             | 1.90                              |
|        | 20 h   | 5.63                  | 0.58                     | 3.01                  | 1.34                  | 119.8                                 | 601.4                             | 2.09                              |

### Current treatment

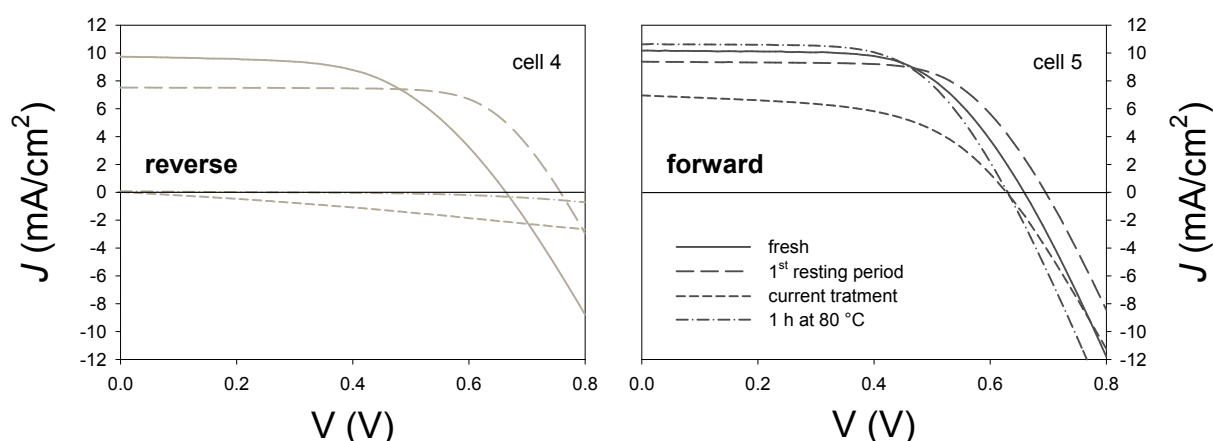

**Fig. S5:** The  $I$ - $V$  scans of the cells exposed to reverse and forward bias current treatment (cells 4 and 5, respectively). The  $I$ - $V$  scans were measured after production, after 1<sup>st</sup> resting period, after reverse or forward bias current treatment and after final heat treatment at 80 °C for 1 h.

The video clip showing the evolution of the spatial defects in the DSSCs that were exposed to reverse or forward bias current treatment is available online (<http://www.rsc.org/suppdata/CP/C4/C4CP01463D/C4CP01463D3.mp4>).



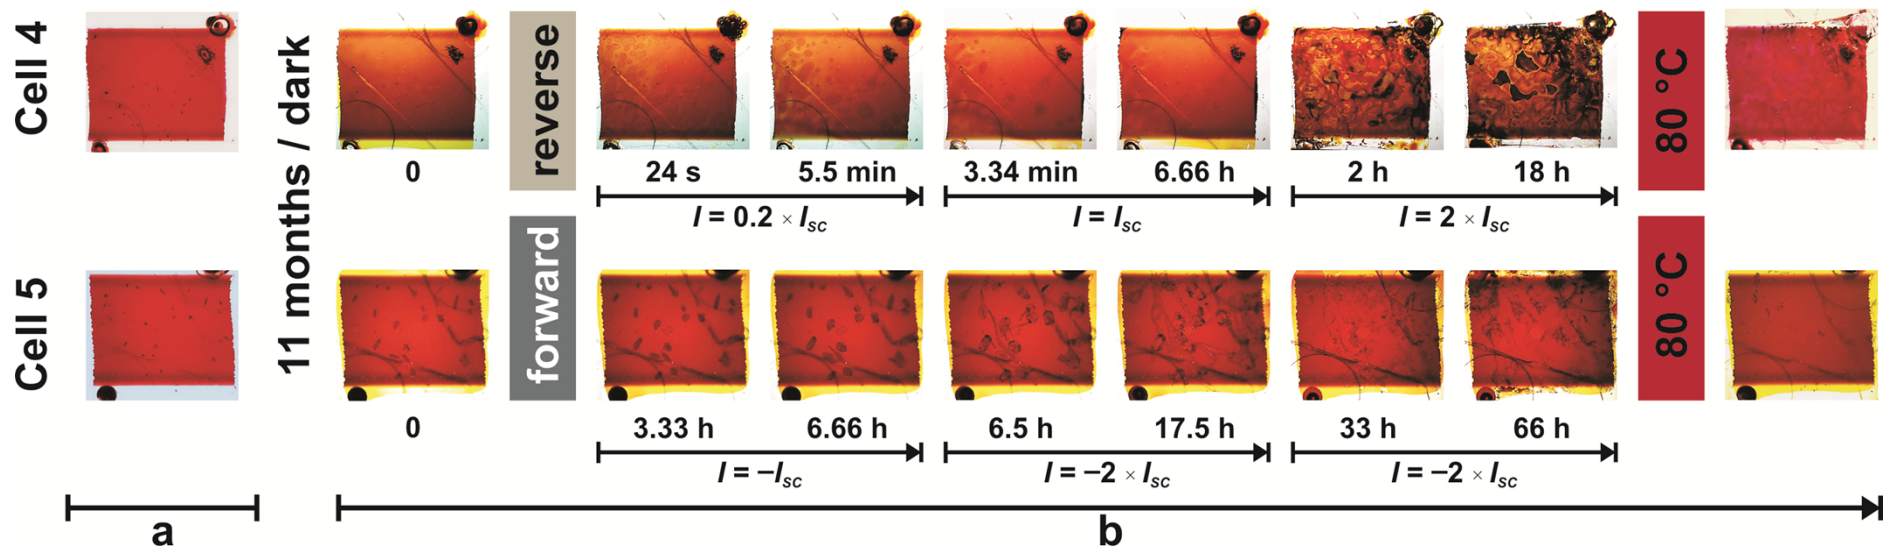

**Fig. S6:** The transmittance images (TI) of the DSSCs exposed to reverse or forward bias current, respectively. The timeline and the values of the applied current during the treatment are given below (b). Additionally, the TI images of the cells 11 months prior the treatment (a) and after the heat treatment at 80 °C for 8 h are given.
